# Supplementary material
Source: PubMed Central journal article supplement (PMC5672970)
Supplement: CJN.03550417SupplementaryData.pdf [file CJN.03550417SupplementaryData.pdf]

Table S1. Focus group question guide

| Questions | We would first like you to think about your experiences leading up to the donation:                                                                                                                       |
|-----------|-----------------------------------------------------------------------------------------------------------------------------------------------------------------------------------------------------------|
| 1.        | What were the factors that made it easier for you to donate and complete the evaluation process? ( <i>Information, education, psychosocial and financial support, family support</i> ).                   |
| 2.        | Were there any barriers or challenges that you had to overcome? How did you overcome them? ( <i>Risk information, fears and concerns, eligibility, family opposition, religious and cultural values</i> ) |
| 3.        | Did you have any concerns about outcomes of donation for yourself? ( <i>Medical, lifestyle, psychological, social financial</i> ) What helped you to donate, despite your concerns?                       |
| 4.        | What were your experiences of the informed consent process? What did you think were the goals of informed consent? How effective was this process?                                                        |
